1 Age-linked suppression of lipoxin A4 mediates cognitive deficits in  
2 mice and humans

3  
4 Fabricio A. Pamplona<sup>1,2,3\*</sup>, Gabriela Vitória<sup>1</sup>, Felipe C. Ribeiro<sup>4</sup>, Carolina A. Moraes<sup>2</sup>,  
5 Pítia Flores Ledur<sup>1</sup>, Karina Karmirian<sup>1,5</sup>, Isis M. Ornelas<sup>1</sup>, Luciana M. Leo<sup>2</sup>, Bruna  
6 Paulsen<sup>6,7</sup>, Felipe K. Sudo<sup>1</sup>, Gabriel Coutinho<sup>1</sup>, Claudia Drummond<sup>1,8</sup>, Naima  
7 Assunção<sup>1</sup>, Bart Vanderborght<sup>1</sup>, Claudio Canetti<sup>9</sup>, Hugo C. Castro-Faria-Neto<sup>2</sup>, Paulo  
8 Mattos<sup>1,10</sup>, Sergio T. Ferreira<sup>1,4,9</sup>, Stevens K. Rehen<sup>1,5</sup>, Fernando A. Bozza<sup>1,2</sup>, Mychael  
9 V. Lourenco<sup>4\*</sup>, Fernanda Tovar-Moll<sup>1\*</sup>

10

11 <sup>1</sup>D'Or Institute for Research and Education (IDOR), Rio de Janeiro, Brazil

12 <sup>2</sup>Laboratório de Imunofarmacologia, Oswaldo Cruz Institute, Oswaldo Cruz Foundation  
13 (FIOCRUZ), Rio de Janeiro, Brazil; <sup>3</sup>Biosciences Program, Federal University for Latin  
14 American Integration, Foz do Iguaçu, Brazil

15 <sup>4</sup>Institute of Medical Biochemistry Leopoldo de Meis; <sup>5</sup>Department of Genetics, Institute  
16 of Biology; <sup>8</sup>Department of Speech and Hearing Pathology; <sup>9</sup>Institute of Biophysics  
17 Carlos Chagas Filho; <sup>10</sup>Institute of Psychiatry, Federal University of Rio de Janeiro, Rio  
18 de Janeiro, RJ 21941-902, Brazil

19 <sup>6</sup>Department of Stem Cell and Regenerative Biology, Harvard University, Cambridge,  
20 MA, USA.

21 <sup>7</sup>Stanley Center for Psychiatric Research, Broad Institute of MIT and Harvard,  
22 Cambridge, MA, USA.

23

24 \*Correspondence to: fabriciopamplona@gmail.com (F.A. Pamplona),  
25 fernanda.tovarmoll@idor.org (F. Tovar-Moll) or mychael@bioqmed.ufrj.br (M.V.  
26 Lourenco).

27

28 Running title: Lipoxin and memory in aging and Alzheimer's disease

29

30 Keywords: lipoxin A4, endocannabinoid signaling, memory, aging, Alzheimer's disease

31

32 **Abstract**

33 Age increases the risk for cognitive impairment and is the single major risk factor for  
34 Alzheimer's disease (AD), the most prevalent form of dementia in the elderly. The  
35 pathophysiological processes triggered by aging that render the brain vulnerable to  
36 dementia involve, at least in part, changes in inflammatory mediators. Here we show  
37 that lipoxin A4 (LXA4), a lipid mediator of inflammation resolution known to stimulate  
38 endocannabinoid signaling in the brain, is reduced in the aging central nervous system.  
39 We demonstrate that genetic suppression of 5-lipoxygenase (5-LOX), the enzyme  
40 mediating LXA4 synthesis, promotes learning impairment in mice. Conversely,  
41 administration of exogenous LXA4 attenuated cytokine production and memory loss  
42 induced by inflammation in mice. We further show that cerebrospinal fluid LXA4 is  
43 reduced in patients with dementia and positively associates with memory performance,  
44 brain-derived neurotrophic factor (BDNF), and AD-linked amyloid- $\beta$ . Our findings  
45 suggest that reduced LXA4 levels may lead to vulnerability to age-related cognitive  
46 disorders and that promoting LXA4 signaling may comprise an effective strategy to  
47 prevent early cognitive decline in AD.

48

49

50

51

52

53

54

## 55 **Introduction**

56 Inflammation constitutes an essential defensive mechanism that is dysregulated  
57 in aging and in several chronic and neurodegenerative disorders, including Alzheimer's  
58 disease (AD) <sup>1, 2</sup>. Accordingly, a chronic imbalance favoring disproportionate pro-  
59 inflammatory responses in the brain and periphery are thought to mediate age-related  
60 cognitive decline and AD pathogenesis <sup>3-9</sup>.

61 Proper control of inflammatory responses depends on resolution processes,  
62 which are controlled by lipid mediators known as resolvins, such as lipoxins <sup>10</sup>. Lipoxin  
63 A4 (LXA4) is an eicosanoid derived from arachidonic acid through transcellular  
64 metabolic pathways that depend on the enzymatic activity of 5-lipoxygenase (5-LOX) <sup>10-</sup>  
65 <sup>12</sup>. In the periphery, LXA4 activates the G-protein-coupled receptor ALX to modulate  
66 gene expression towards resolution of inflammation and to promote immune cell  
67 recruitment to the site of infection or damage <sup>10</sup>. Putative effects of LXA4 in the brain  
68 have long remained elusive, due to the low expression of ALX receptors in the central  
69 nervous system (CNS) <sup>13</sup>.

70 We and others have suggested that LXA4 protects the central nervous system  
71 against injuries <sup>14-18</sup>, including amyloid- $\beta$  (A $\beta$ ) toxicity in mice <sup>15, 19, 20</sup>. However, while  
72 the processes that propagate cytokine-mediated inflammation in AD have been  
73 thoroughly investigated, very little is known about the impact and mechanisms of LXA4  
74 on brain function. Given that ALX receptors are poorly expressed in the central nervous  
75 system <sup>13</sup>, other mechanisms should be responsible for the brain actions of LXA4. We  
76 have previously demonstrated that LXA4 binds to CB1 receptors in the brain to  
77 stimulate endocannabinoid signaling <sup>19</sup>. These findings raise the prospect that LXA4

78 might be relevant to complex brain functions and that LXA4 signaling might be impaired  
79 in age-related cognitive diseases linked to aberrant inflammation, such as AD.

80 Herein we report that mammalian neurons and microglia produce considerable  
81 levels of LXA4. We further demonstrate that brain and peripheral LXA4, as well as  
82 memory, decline with aging and that genetic suppression of 5-LOX results in memory  
83 impairment in mice. Conversely, administration of exogenous LXA4 attenuated cytokine  
84 production and memory loss induced by an inflammatory stimulus in mice. We finally  
85 present results from a human study demonstrating that cerebrospinal fluid (CSF) LXA4  
86 levels are reduced in dementia. Furthermore, LXA4 correlates with memory  
87 performance, A $\beta$  and brain-derived neurotrophic factor (BDNF) in the human CSF.  
88 Altogether, these results support a protective role for LXA4 in the brain that is  
89 dysregulated in aging and, to a greater extent, in dementia.

90

## 91 **Methods**

92

## 93 **Ethics**

94 All mouse experiments were performed under protocols approved and supervised by  
95 the Institutional Animal Care and Use Committee of Federal University of Rio de Janeiro  
96 (CEUA-UFRJ) (protocol no. IBQM058). Experimental procedures involving human  
97 clinical data and CSF samples were approved by the Institutional Review Board (IRB) of  
98 Copa D'Or Hospital (protocol #47163715.0.0000.5249). Written informed consent was  
99 obtained from all volunteers. Samples were anonymized and measurements were

100 performed by trained investigators in a blinded fashion. All studies have been performed  
101 according to the national and international ethical regulations and standards.

102

### 103 **iPSC cultures**

104 Three different lines of human induced pluripotent stem cells were employed in this  
105 study - GM23279A iPSC line, obtained commercially from Coriell Institute Biobank; CF2  
106 line, generated from fibroblasts; and C15 line, obtained from urine cells. Cells were  
107 reprogrammed using the CytoTune 2.0 Sendai Reprogramming kit (Thermo Fisher  
108 Scientific, USA) and characterization of the reprogrammed cell lines was conducted by  
109 immunostaining of both iPSCs colonies and iPSCs- derived embryoid bodies for self-  
110 renewal and three germ layer markers as described<sup>21, 22</sup>. iPSCs were used to generate  
111 human neural progenitor cells (NPCs) by induction with retinoic acid (RA) for 18 days<sup>23</sup>,  
112<sup>24</sup>. When neural tube-like structures emerged, they were collected and re-plated on  
113 adherent dishes treated with 10 µg/mL Poly-L-ornithine and 2.5 µg/mL laminin (Thermo  
114 Fisher Scientific). After passages using Accutase, homogenous cultures were obtained  
115<sup>25</sup>. NPCs were maintained and grown in DMEM/F-12 supplemented with N2, B-27, 25  
116 ng/mL bFGF and 20 ng/mL EGF (Thermo Fisher Scientific), with medium changes  
117 every other day. The astrocyte cultures and mixed neuronal cultures were obtained from  
118 the differentiation of neural stem cells (NSCs), as described<sup>26</sup>.

119

### 120 **Primary cell cultures**

121 Primary astrocyte, microglial and neuronal cultures were obtained from Swiss mice.  
122 Brain tissue was dissociated into single cells in DMEM-F12 (Invitrogen; Carlsbad, CA,

123 USA) supplemented with glutamine (2 mM), penicillin and streptomycin (0.5 mg/mL,  
124 HyClone), amphotericin B (0.65  $\mu$ M, Sigma Aldrich, St. Louis, MO, USA) and 10% fetal  
125 bovine serum (FBS, Invitrogen; Invitrogen, Carlsbad, CA, USA). Cells were plated in 25  
126 cm<sup>2</sup> bottles pre-treated with poly-L-lysine (Sigma Aldrich, St. Louis, MO, USA). To  
127 generate astrocytes, cultures were maintained at 37 °C in an atmosphere of 5 % CO<sub>2</sub>  
128 for 7 days until confluence was achieved. Confluent cells were passaged to generate  
129 purified astrocyte cultures. Microglia were isolated at day 13 *in vitro* by shaking for 45-  
130 60 minutes and plated on adherent dishes supplemented with DMEM-F12 with 10%  
131 FBS and maintained for more 24 hours. Hippocampal neurons were obtained from 16-  
132 day embryonic mice and maintained in Neurobasal medium (Invitrogen; Carlsbad, CA,  
133 USA) supplemented with B-27 (Life Technologies, Carlsbad CA, USA), penicillin,  
134 streptomycin (0.5 mg/mL, HyClone), glutamine ( $2 \times 10^{-3}$  M), and fungizone (0.65  $\mu$ M,  
135 Sigma Aldrich, St. Louis, MO, USA). Cultures were maintained at 37°C in a humidified  
136 atmosphere with 5% CO<sub>2</sub> at 9 days *in vitro*. Cell homogenates were collected,  
137 centrifuged at 10000 g for 5 min at 4°C, and used for LXA4 measurements.

138

### 139 **Brain organoids**

140 Brain organoids were generated from GM23279A induced pluripotent stem cell (iPSC)  
141 line as previously described<sup>27</sup>. Briefly, 9,000 iPSC per well were plated of an ultra-low  
142 attachment 96-well plate in hESC medium (20% knockout serum replacement; Life  
143 Technologies) containing 50  $\mu$ M ROCKi (Y27632; Merck Millipore, USA) and 4 ng/ml b-  
144 FGF. The plate was spun, and cells kept for 7 days to allow formation of embryoid  
145 bodies (EBs). On the seven following days, EBs were changed to ultra-low attachment

146 plates, submitted to a Matrigel bath for 1h and media changed from neuroinduction  
147 media [1% N2 supplement (Gibco), 1% GlutaMAX (Life Technologies), 1% MEM-  
148 NEAAs, 1% P/S, and 1 µg/ml heparin in DMEM/F12 (Life Technologies)] to  
149 differentiation media minus vitamin A (50% neurobasal medium, 0.5% N2, 1% B27  
150 supplement without vitamin A, 1:100 2-mercapto-ethanol, 0.5% MEM-NEAA, 1%  
151 GlutaMAX, and 1:100 P/S in DMEM/F12). On day 15, organoids were transferred to  
152 agitation in 6-well plates at 90 rpm, and media was changed to differentiation media  
153 plus vitamin A (50% neurobasal medium, 0.5% N2, 1% B27 supplement with vitamin A,  
154 1:100 2-mercapto-ethanol, 0.5% MEM-NEAA, 1% GlutaMAX, and 1:100 P/S in  
155 DMEM/F12), and replaced every four days until ready for experiment. On day 45, brain  
156 organoids were fixed overnight in 4% PFA, then dehydrated in 30% sucrose, frozen in  
157 optimal cutting temperature compound on dry ice, and sectioned (20 µm thickness) with  
158 a cryostat (Leica Biosystems, Germany).

159

## 160 **Mouse strains**

161 Swiss albino mice were provided by Fundação Oswaldo Cruz (FIOCRUZ); inbred  
162 C57BL/6 were provided by Charles River and 5-LOX knockouts (and wild-type  
163 littermates) were provided by FIOCRUZ and kept in the animal facilities at the Federal  
164 University of Rio de Janeiro. Adult male mice were used throughout the study and  
165 tested during the light phase of the light cycle. Mice were maintained on a 12 h  
166 light/dark cycle with food and water *ad libitum*, with maximum of 5 mice per cage.

167

## 168 ***In vivo* treatments**



169 Adult male Swiss mice received an intraperitoneal (i.p.) injection of 0.3 mg/kg  
170 lipopolysaccharide (LPS) or vehicle immediately after contextual fear conditioning  
171 training session. One hour later, mice received an intracerebroventricular (i.c.v.)  
172 injection of either LXA4 (1 pmol) or vehicle and were tested for memory 7 days later.

173

#### 174 **Immunofluorescence**

175 For immunofluorescence in brain organoids, frozen sections were rinsed with PBS and  
176 permeabilized with PBS-Triton 0.3% (PBST) for 15 min. Slides were then incubated with  
177 0.01M citrate buffer with 0.05% Tween 20 pH 6 for 10 min at 98°C for antigen retrieval  
178 and blocked with blocking solution (PBS with 3% BSA) for 2 hours at room temperature.  
179 Primary antibodies against 5-LOX (Cayman Chemical, 1:100) or MAP2 (Sigma-Aldrich,  
180 1:300) diluted in blocking solution were incubated at 4°C overnight. Sections were then  
181 rinsed with PBS and incubated in AlexaFluor-conjugated IgG secondary antibody goat  
182 anti-mouse, rabbit or goat (Invitrogen, 1:400) for 1 hour at room temperature and  
183 washed 3 times for 5 min in PBS. For nuclear staining, sections were incubated with  
184 DAPI for 5 min. Slides were washed again 3 times for 5 min in PBS and then cover-  
185 slipped with Aqua-Poly/Mount (Polysciences, Inc). Images were acquired using a Leica  
186 TCS SP8 confocal microscope. For immunofluorescence experiments in the mouse  
187 hippocampus, mice were transcardially perfused with saline and 4% formaldehyde.  
188 Brains were removed and post-fixed in 4% formaldehyde overnight, then submerged in  
189 30% sucrose solution. Forty  $\mu\text{m}$ -thick hippocampal cryosections were obtained,  
190 mounted on glass slides, and exposed to 0.01M citrate buffer for antigen retrieval for 20  
191 min at 60°C. Tissue was permeabilized with 0.5% Triton X-100 in 50 mM ammonium

192 chloride for 20 min at room temperature. Sections were then incubated in blocking  
193 solution (5% bovine serum albumin in PBST) for 60 min at room temperature and then  
194 incubated with anti-CB1R (Merck Millipore, 1:1000) in blocking solution overnight at 4  
195 °C. Sections were then rinsed with PBST and incubated with AlexaFluor-conjugated  
196 anti-rabbit IgG secondary antibodies (1:400) for 2 hours at room temperature, followed  
197 by a short 5 min incubation in a DAPI solution (Molecular Probes). A 5 min incubation in  
198 1% Sudan Black B prepared in 70% ethanol was applied to quench autofluorescence.  
199 Tissue was mounted on coverslips with Aqua Poly/Mount (Polysciences) and imaged on  
200 a Zeiss AxioImager M2 microscope. Image fluorescence was quantified on ImageJ<sup>28</sup>  
201 after selection of the stratum pyramidale and stratum radiatum of hippocampal CA1 and  
202 CA3 subfields as regions of interest.

203

## 204 **Human samples**

205 CSF samples for this study were obtained from a cohort recruited at the D'Or Institute of  
206 Research and Education (IDOR) in Rio de Janeiro, Brazil. This cohort comprised  
207 healthy controls (HC; N = 25), and cognitively impaired subjects with diagnosis of either  
208 amnesic mild cognitive impairment (aMCI; N = 13), Alzheimer's disease (N = 14), or  
209 dementia with Lewy bodies (DLB; N = 9). Inclusion criteria for this study were: age > 60  
210 years; absence of other neurological conditions, neurodevelopmental or genetic  
211 diseases; native Brazilian Portuguese speakers; formal education  $\geq$  8 years; no  
212 restriction for MRI studies; no severe metabolic disease). All patients were evaluated  
213 with the same extensive clinical, neuropsychological and neuroimaging investigation as  
214 described<sup>29-33</sup>. For demographics and biomarker information, see Table 1. CSF

215 samples were collected by lumbar puncture performed around 11 a.m. in all cases, to  
216 minimize circadian fluctuations. CSF was centrifuged, and the supernatant was  
217 collected, aliquoted, and immediately frozen at  $-80^{\circ}\text{C}$ . Before assays, samples were  
218 thawed and kept on ice until use. Samples and calibrators were run in duplicates.

219

## 220 **ELISA**

221 Mouse brains were harvested, and lipid extraction was performed with ethanol (5  $\mu\text{L}/\text{mg}$   
222 of wet tissue) followed by centrifugation for 5 min at 10,000  $\times$  g. The supernatant was  
223 applied directly into a double-sandwich ELISA kit, read at 650 nm and normalized by  
224 wet tissue weight (g). Plasma and CSF samples and culture supernatants were applied  
225 to the ELISA kits according to manufacturer's instructions. ELISA kits for LXA4 (#EA46)  
226 were from Oxford Biomedical Research (Rochester Hills, MI). ELISA kits for  $\text{A}\beta_{42}$ , and  
227 total tau (t-tau) were provided by Euroimmun (Lübeck, Germany) and experiments  
228 were run following manufacturer's instructions.

229

## 230 **Inhibitory avoidance**

231 The step-down inhibitory avoidance apparatus consisted of a box measuring 26 x 10 x  
232 35 cm with a 10 x 10 x 4 cm platform placed in the center, surrounded by a floor made  
233 of parallel bronze bars and connected to a power source. For the training sessions,  
234 mice were placed on the platform and when they stepped down with four paws onto the  
235 grid they received a 0.7 mA foot shock for 2 s, and immediately returned to their home  
236 cage. For the test session (30 min or 24 h after training), animals were again placed on  
237 top of the platform, and latency to step down was recorded. For the protocol with

238 multiple trials, a milder shock of 0.5 mA was used, and the procedure was repeated until  
239 the animal learned to remain 180 s on the platform for 180 s (criteria). For memory  
240 extinction, mice were conditioned in the step-down inhibitory avoidance task, as  
241 described above, only with a 1 mA foot shock intensity. Starting on the 12<sup>th</sup> day after  
242 conditioning, mice were submitted to successive extinction trials in 24 h intervals, where  
243 they were placed on the platform and allowed to step down onto the grid in the absence  
244 of a foot shock. The latency to step down was recorded and mice were allowed to freely  
245 explore the apparatus for 30 s after every trial. Reduction in step-down latency across  
246 successive trials indicated extinction learning.

247

### 248 **Contextual Fear Conditioning**

249 To assess contextual fear memory consolidation, a two-phase protocol was used. Swiss  
250 mice were initially trained in the conditioning cage (40 x 25 x 30 cm) and were allowed  
251 to freely explore for 3 minutes followed by application of a single foot shock (1 mA) for 2  
252 s. Mice were kept for another 1 minute in the cage and removed. Right after training,  
253 mice received an intraperitoneal injection of 0.3 mg/kg lipopolysaccharide (LPS)  
254 obtained from *E. coli* 0127:B8 (Sigma-Aldrich) or vehicle. One hour later, mice received  
255 an intracerebroventricular (i.c.v.) injection of either LXA4 (1 pmol) or vehicle. Seven  
256 days after training, mice were presented to the same cage for 5 minutes without  
257 receiving a foot shock. Freezing behavior was recorded automatically using the  
258 Freezing software (Panlab; Cornella, Spain). In all behavioral experiments, the  
259 experimenter was blinded to the groups tested.

260

## 261 **Statistical analysis**

262 Statistical analyses were performed using GraphPad Prism 6 software (La Jolla, CA) or  
263 the IBM SPSS Statistics v. 26 (Armonk, NY). Differences between two independent  
264 groups were analyzed using Student's t-test. When three or more independent  
265 experimental groups were compared, one- or two-way ANOVA was used, followed by  
266 appropriate *post hoc* tests, as stated in "Figure Legends". For correlations, data  
267 distribution was initially assessed using Shapiro-Wilk Test. After adjustment for age,  
268 partial rank correlations were performed to assess the relationship between CSF LXA4  
269 levels and clinical/biomarker variables. Significance level was set at 0.05. The predictive  
270 power of CSF LXA4, alone or in combination with A $\beta$ <sub>42</sub>, to identify clinical AD was tested  
271 by plotting receiver operating characteristic (ROC) curves, widely used to determine the  
272 diagnostic potential of biomarkers, and determining the area under the curve (AUC) with  
273 a confidence interval of 0.95.

274

## 275 **Results**

### 276 *LXA4 is produced by neurons and microglia*

277 Lipoxins, including LXA4, are locally produced by immune cells at sites of  
278 inflammation or systemically <sup>11</sup>. Although we and others have previously reported that  
279 LXA4 is bioactive in the brain <sup>14, 15, 19</sup>, whether brain cells comprise a source for LXA4  
280 remains unknown. We first used primary cultures to investigate whether brain cells  
281 produced LXA4 at detectable levels. We found that mouse hippocampal neurons and  
282 microglia had significantly higher content of LXA4 than astrocytes (Fig. 1a). We next  
283 used human induced pluripotent stem cells (iPSCs) to derive human neural progenitor

284 cell (NPC), neuron, astrocyte or microglial-like cultures to determine the levels of LXA4.  
285 We found that human iPSC-derived neurons produce considerably higher levels of  
286 LXA4 than astrocytes or NPCs (Fig. 1a). Furthermore, in line with mouse results, levels  
287 of human microglia-sourced LXA4 are comparable to human neurons, suggesting  
288 microglia as a key producer of LXA4 (Fig. 1a). To further ascertain whether neuronal 5-  
289 LOX expression would be present in more complex systems, we performed  
290 immunohistochemical experiments to label 5-LOX in 45-day-old human brain organoids  
291 derived from iPSC. At that stage, human brain organoids express a biochemical profile,  
292 patterning, and structural organization similar to what is observed in the human  
293 embryonic brain <sup>27</sup>. We observed prominent 5-LOX labeling in microtubule-associated  
294 protein 2 (MAP2)-positive cells (Fig. 1b), confirming that human neurons typically  
295 located in the outer layers of human brain organoids express 5-LOX. Together, our  
296 results raise the possibility that neurons and microglia are important sources of LXA4 in  
297 the human brain.

298

### 299 *Aging reduces systemic and brain LXA4 levels in mice*

300 Since aging impairs systemic response to injuries <sup>34, 35</sup> and renders the brain  
301 vulnerable to neurodegenerative conditions <sup>36</sup>, we next determined whether levels of  
302 LXA4 would be modified by aging in mice. We found that plasma and brain LXA4 levels  
303 were reduced in 12-month-old male Swiss mice compared to young 3-month-old  
304 controls (Fig. 2a,b). This is accompanied by evident short-term memory impairment in  
305 the inhibitory avoidance memory test, as aged mice presented reduced latency to step

306 down from the platform in the test sessions (Fig. 2c). Results indicate that reduced brain  
307 and peripheral LXA4 levels concur with cognitive deficits in aged mice.

308

### 309 *Suppression of LXA4 mimics age-associated memory loss in mice*

310 We next hypothesized that reductions in LXA4 would be causally implicated in  
311 memory impairments in mice. Therefore, we tested memory performance in 3-month-old  
312 (young) 5-LOX homozygous knockout mice (5-LOX<sup>-/-</sup>), which show reduced circulating  
313 LXA4 levels<sup>19</sup>, and their respective wild-type littermates (WT) in the inhibitory  
314 avoidance memory task. We used adult 5-LOX<sup>-/-</sup> mice in these experiments to mimic  
315 reductions in circulating LXA4 and specifically dissect the roles of 5-LOX, while avoiding  
316 potential confounders triggered by normal aging. Control experiments revealed no  
317 differences in body weight (Supp. Fig. S1a) or food and water intake (Supp. Fig. 1b,c)  
318 across genotypes. Additionally, levels of hippocampal CB1 receptors were similar in 5-  
319 LOX<sup>-/-</sup> and WT mice (Supp. Fig. 1d-f).

320 5-LOX<sup>-/-</sup> mice took significantly more learning sessions in the inhibitory avoidance  
321 task to reach criteria than WT (Fig. 2d). While WT showed normal memory  
322 performance, 5-LOX<sup>-/-</sup> mice presented impaired short-term, but not long-term memory  
323 (Fig. 2e,f). Furthermore, 5-LOX<sup>-/-</sup> mice had impaired extinction of learned fear memory  
324 (Fig. 2g), which is in further agreement with learning deficits. Altogether, these results  
325 demonstrate that 5-LOX-mediated LXA4 synthesis supports proper cognitive function  
326 and indicate that reductions in LXA4 may render the brain vulnerable to dysfunction and  
327 memory impairment.

328

329 *Administration of LXA4 attenuates inflammatory responses and memory loss*

330 Our results so far indicated that LXA4-mediated signaling could be part of a  
331 protective mechanism against age-related cognitive decline, which is, at least in part,  
332 mediated by inflammation<sup>37</sup>. We then sought to determine whether administration of  
333 LXA4 would protect against impairments in memory consolidation induced by an  
334 inflammatory injury. Mice were trained in a contextual fear conditioning paradigm and  
335 received a post-training intraperitoneal (i.p.) injection of 0.3 mg/kg lipopolysaccharide  
336 (LPS) or vehicle. One hour after LPS, mice received an intracerebroventricular (i.c.v.)  
337 injection of either LXA4 (1 pmol) or vehicle and were tested for memory 7 days later.  
338 We found that i.c.v. LXA4 administration rescued impaired contextual fear memory  
339 consolidation in LPS-injected mice (Fig. 3a), advocating towards a neuroprotective  
340 effect via reduction of inflammatory pathways.

341 We thus attempted to determine the impact of LXA4 on LPS-induced  
342 inflammatory cytokine production. I.c.v. LXA4 administration reduced levels of  
343 interleukin 1 $\beta$  (IL-1 $\beta$ ) (Fig. 3b,c) and interleukin 6 (IL-6) (Fig. 3d,e) in the brain and  
344 plasma of LPS-treated mice. These results indicate that LXA4 attenuates peripheral and  
345 brain inflammation, and rescues inflammation-induced cognitive defects in mice.

346

347 *Cerebrospinal fluid LXA4 declines with aging and dementia in humans*

348 To test the potential relevance of LXA4 in humans, we investigated LXA4 levels  
349 in the cerebrospinal fluid (CSF) of a cohort of human subjects in a memory clinic. They  
350 were diagnosed as mild cognitive impairment (MCI), AD, dementia with Lewy bodies  
351 (DLB), or controls (see Supp. Table 1 for demographics and biomarker information). We



352 initially found that LXA4 declines with aging in human CSF in this cohort (Fig. 4a), in line  
353 with our mouse studies. We further determined that LXA4 levels were markedly  
354 decreased in subjects with AD or DLB, but not in MCI, as compared to controls (Fig.  
355 4b). Together, these results support the notion that aging leads to a reduction in brain  
356 LXA4 levels. The decrease in LXA4-mediated protective mechanisms may lead to  
357 vulnerability to cognitive diseases and, presumably, neurodegeneration.

358

359 *Cerebrospinal fluid LXA4 correlates with memory performance, BDNF, and A $\beta$ <sub>42</sub> levels*  
360 *in humans*

361 We then investigated whether CSF LXA4 would associate with memory  
362 performance and the levels of markers relevant to AD. CSF LXA4 showed positive  
363 correlations with mini-mental state exam (MMSE) scores, a proxy for memory  
364 performance in humans (Fig. 4c). We further found that LXA4 positively correlates with  
365 BDNF, a neurotrophin essential for memory function<sup>38, 39</sup>, in the CSF (Fig. 4d). These  
366 results indicate that central LXA4 actions may favor brain homeostasis and cognition.

367 We next addressed potential associations between CSF LXA4 and AD  
368 biomarkers (A $\beta$ <sub>42</sub> and tau). We found that CSF LXA4 positively associates with CSF  
369 A $\beta$ <sub>42</sub> (Fig. 4e), but not with tau (Supp. Fig. 2). Finally, combination of CSF LXA4 and  
370 A $\beta$ <sub>42</sub> slightly increased the sensitivity and specificity of AD diagnostics in a receiver  
371 operating characteristic (ROC) curve (Fig. 4f). These results suggest that declines in  
372 CSF LXA4 correlate with brain A $\beta$ <sub>42</sub> accumulation, possibly facilitating its neurotoxic  
373 actions.

374

## 375 **Discussion**

376           Age-related cognitive impairment and dementia are amongst the causes of  
377 significant disability in the elderly and effective interventions are still not available.  
378 Nonetheless, it is well established that loss of immune homeostasis and aberrant  
379 inflammatory responses comprise significant factors predisposing individuals to brain  
380 dysfunction and dementia<sup>40, 41</sup>. Here we provide evidence suggesting that LXA4 is part  
381 of an endogenous protective mechanism that decreases with aging and renders the  
382 brain vulnerable to memory failure and dementia.

383           We first addressed a long-standing question of whether brain cells produce  
384 LXA4. Previous evidence indicated that rodent neurons and microglia express 5-LOX,  
385 the enzyme required for LXA4 synthesis<sup>16, 17</sup>. Nonetheless, direct evidence for LXA4  
386 production in brain cells was lacking. We found that mouse and human neurons and  
387 microglia in culture actively produce and release LXA4, whereas astrocytes produce  
388 smaller amounts of LXA4. These results suggest that neurons and microglia could act  
389 as local sources of LXA4 in the brain and builds upon our previous data showing that  
390 LXA4 is present in the brain despite the absence of its canonical ALX receptor, at least  
391 under physiological conditions<sup>19</sup>.

392           We and others have provided initial evidence suggesting that peripheral LXA4  
393 levels are reduced with aging in mice and humans. While we have previously shown  
394 that 12-month-old mice present reduced plasma levels of LXA4 as compared to 3-  
395 month-old mice<sup>14</sup>, Gangemi et al. (2005) demonstrated that urinary LXA4 is markedly  
396 reduced in aged humans<sup>34</sup>. We now confirmed these previous results in plasma and

397 extended our studies to demonstrate that central LXA4 also declines with age and  
398 accompanies memory impairment in mice.

399 To further support that reduced LXA4 underlies memory impairment, we  
400 determined that 5-LOX<sup>-/-</sup> mice, which present reduced plasma and brain LXA4 content,  
401 present learning impairment in an inhibitory avoidance task. We decided to use 3-  
402 month-old 5-LOX<sup>-/-</sup> mice (instead of aged subjects) in these experiments to circumvent a  
403 potential source of confusion with other aspects related to the aging process. For  
404 instance, 5-LOX<sup>-/-</sup> mice have been reported to develop additional age-dependent  
405 behavioral alterations, such as anxiety-like behavior<sup>42</sup>, which are not present in young  
406 mice<sup>14</sup>. Together, these results demonstrate that reduced LXA4 is sufficient to trigger  
407 memory failure in mice. Future studies are warranted to determine the relative  
408 contributions of circulating and brain LXA4 to cognition by ablating 5-LOX in specific  
409 sources of LXA4 (i.e. neurons, microglia, neutrophil, platelets).

410 5-LOX was previously shown to have a deleterious impact in mouse models of  
411 AD and tauopathy<sup>43-46</sup>, potentially due to dyshomeostasis of other lipid derivatives.  
412 Conversely, stimulation of LXA4 signaling through aspirin-triggered lipoxin (ATL)  
413 resulted in beneficial actions, including reduced microglial reactivity, less A $\beta$ <sub>42</sub>  
414 accumulation and tau phosphorylation, and attenuation of memory impairment in mouse  
415 models of AD<sup>15, 20</sup>. Notably, LXA4 was reported to attenuate A $\beta$ -induced memory  
416 impairment through CB1 receptors<sup>19</sup>. Our findings further demonstrate that brain  
417 administration of LXA4 prevents inflammation-induced cytokine upregulation and  
418 memory consolidation defects in mice. Results suggest that preserving LXA4 signaling

419 across adulthood might be beneficial to ward off persistent inflammation, cognitive  
420 decline, and AD risk at later stages of life.

421 We have previously shown that LXA4 acts as an allosteric agonist of CB1  
422 receptors in the brain, enhancing the affinity of CB1 receptors to anandamide<sup>19</sup>. Given  
423 that endocannabinoid signaling through CB1 receptors is essential for proper brain  
424 functions<sup>47-50</sup>, locally produced LXA4 could serve as a means of intercellular  
425 communication in the CNS to fuel synaptic plasticity, potentiate astrocyte metabolism  
426 and microglial surveillance. Conversely, reduced brain LXA4 could explain, at least in  
427 part, compromised CB1 receptor signaling, which may then translate into memory  
428 impairment<sup>51</sup>.

429 Our results show that CSF LXA4 is considerably reduced in patients with  
430 dementia (AD and DLB), conferring translational relevance to the rodent studies.  
431 Significant correlations of CSF LXA4 with BDNF and memory function in humans also  
432 indicate potential pro-mnemonic actions of central LXA4 and highlight the need for  
433 further translational investigation of the underlying mechanisms. An intriguing  
434 observation relies on the positive correlation of CSF LXA4 with A $\beta$ <sub>42</sub>, but not with tau, in  
435 humans. This suggests that brain A $\beta$  accumulation (as assessed by lower CSF A $\beta$ <sub>42</sub>)  
436 may moderate LXA4 levels in the CNS independently of tau pathology (as determined  
437 by CSF tau). These results encourage additional investigation to clarify the interrelation  
438 of A $\beta$ <sub>42</sub>, tau and LXA4, as well as to determine whether incorporation of LXA4  
439 measurements into a CSF biomarker panel can aid in the discrimination of a subset of  
440 AD cases, thereby improving overall diagnostics.

441           Activation of the innate immune system appears to mediate cognitive decline and  
442 AD pathogenesis<sup>37, 52</sup>. Indeed, aberrant cytokine release<sup>53, 54</sup> and abnormal innate  
443 immunity response to brain A $\beta$  deposition have been reported in mouse models and  
444 patients of AD<sup>55, 56</sup>. Infiltration of immune cells, such as neutrophils<sup>57</sup>, into the brain  
445 may shift cellular responses towards reduced LXA4 production and, consequently,  
446 increased neurotoxicity in AD.

447           We hypothesize that LXA4 deploys a dual mechanism as an anti-inflammatory  
448 and neuroprotective agent, thereby contributing to resilience of central nervous system  
449 against disease-associated insults, such as A $\beta_{42}$  in AD. Hence, LXA4 levels may be  
450 useful as a biomarker of brain vulnerability, and its decreased levels may indicate a  
451 homeostatic breakdown. Since a significant part of the CB1 receptor-related effects of  
452 anandamide are due to synergistic LXA4 interaction<sup>19</sup>, the vulnerability window caused  
453 by age-associated LXA4 reduction might be conceived as part of the “endocannabinoid  
454 deficiency syndrome” hypothesis<sup>58</sup>. This concept advocates that under circumstances  
455 of relatively low endocannabinoid signaling, certain inflammation-linked injuries, such as  
456 fibromyalgia, inflammatory bowel syndrome and migraine, become more incident. Here  
457 we propose to extend this concept to include neurodegeneration and dementia.

458           In summary, our findings support the notion that LXA4 signaling may comprise  
459 an endogenous protective mechanism that renders the brain vulnerable to the  
460 exacerbated inflammation and neurodegenerative factors (i.e. A $\beta_{42}$  deposition).  
461 Preventing declines in LXA4 levels may preserve endocannabinoid signaling, brain  
462 homeostasis, and cognition, thereby contributing to reduced odds of dementia. Future  
463 studies are needed to establish the intricate signaling pathways initiated by brain

464 actions of LXA4, as well as to test whether stimulation of LXA4 (or the endocannabinoid  
465 system) is effective in delaying cognitive decline in aged humans.

466

#### 467 **Acknowledgements**

468 This work was supported by grants from Fundação Carlos Chagas Filho de Amparo à  
469 Pesquisa do Estado do Rio de Janeiro (FAPERJ) to FAP, HCCFN, and MVL, Conselho  
470 Nacional de Desenvolvimento Científico e Tecnológico (CNPq) to FAP and MVL, from  
471 Alzheimer's Association (AARG-D-615714) to MVL, Serrapilheira Institute (R-2012-  
472 37967) to MVL, and intramural grants from the D'Or Institute for Research and  
473 Education (IDOR) and Rede D'Or São Luiz Hospital Network. We thank the IDOR  
474 clinical and imaging staff for patients' recruitment and diagnostic investigation.

475

#### 476 **Author contributions**

477 FAP, FTM designed the study. FAP, MVL, FCR, GV, CM, PFL, KK, IMO, LML, BP, FKS,  
478 GC, CD, NA, BV, and CC performed research. FAP, MVL, BP, and FKS analyzed data.  
479 FAP, MVL, CC, HCCFN, SKR, FAB, and FTM contributed reagents, materials, animals,  
480 and analysis tools. FAP, MVL, STF, FAB, and FTM analyzed and discussed results.  
481 FAP and MVL wrote the manuscript.

482

#### 483 **Conflict of Interest**

484 The authors declare no conflict of interests.

485

#### 486 **References**

- 487 1. Selles MC, Oliveira MM, Ferreira ST. Brain Inflammation Connects Cognitive and  
488 Non-Cognitive Symptoms in Alzheimer's Disease. *J Alzheimers Dis* 2018; **64**(s1):  
489 S313-S327.
- 490
- 491 2. De Felice FG, Ferreira ST. Inflammation, defective insulin signaling, and  
492 mitochondrial dysfunction as common molecular denominators connecting type 2  
493 diabetes to Alzheimer disease. *Diabetes* 2014; **63**: 1-11.
- 494
- 495 3. Lourenco MV, Ferreira ST, De Felice FG. Neuronal stress signaling and  
496 eIF2alpha phosphorylation as molecular links between Alzheimer's disease and  
497 diabetes. *Prog Neurobiol* 2015; **129**: 37-57.
- 498
- 499 4. Clarke JR, Lyra ESNM, Figueiredo CP, Frozza RL, Ledo JH, Beckman D *et al.*  
500 Alzheimer-associated Abeta oligomers impact the central nervous system to  
501 induce peripheral metabolic deregulation. *EMBO Mol Med* 2015; **7**(2): 190-210.
- 502
- 503 5. Lourenco MV, Clarke JR, Frozza RL, Bomfim TR, Forny-Germano L, Batista AF  
504 *et al.* TNF- $\alpha$  mediates PKR-dependent memory impairment and brain IRS-1  
505 inhibition induced by Alzheimer's  $\beta$ -amyloid oligomers in mice and monkeys. *Cell*  
506 *Metab* 2013; **18**(6): 831-843.
- 507
- 508 6. Heneka MT, Carson MJ, Khoury JE, Landreth GE, Brosseron F, Feinstein DL *et*  
509 *al.* Neuroinflammation in Alzheimer's disease. *Lancet Neurol* 2015; **14**(4): 388-  
510 405.
- 511
- 512 7. Yin F, Sancheti H, Patil I, Cadenas E. Energy metabolism and inflammation in  
513 brain aging and Alzheimer's disease. *Free Radic Biol Med* 2016; **100**: 108-122.
- 514
- 515 8. Lopez-Rodriguez AB, Hennessy E, Murray CL, Nazmi A, Delaney HJ, Healy D *et*  
516 *al.* Acute systemic inflammation exacerbates neuroinflammation in Alzheimer's

- 517 disease: IL-1beta drives amplified responses in primed astrocytes and neuronal  
518 network dysfunction. *Alzheimers Dement* 2021.
- 519
- 520 9. Lyra-e-Silva NM, Goncalves RA, Pascoal TA, Lima-Filho RAS, Resende EPF,  
521 Vieira ELM *et al.* Pro-inflammatory interleukin-6 signaling links cognitive  
522 impairments and peripheral metabolic alterations in Alzheimer's disease. *Transl*  
523 *Psychiatry* 2021; **11**(1): 251.
- 524
- 525 10. Chandrasekharan JA, Sharma-Walia N. Lipoxins: nature's way to resolve  
526 inflammation. *J Inflamm Res* 2015; **8**: 181-192.
- 527
- 528 11. Buckley CD, Gilroy DW, Serhan CN. Proresolving lipid mediators and  
529 mechanisms in the resolution of acute inflammation. *Immunity* 2014; **40**(3): 315-  
530 327.
- 531
- 532 12. Martini AC, Forner S, Bento AF, Rae GA. Neuroprotective effects of lipoxin A4 in  
533 central nervous system pathologies. *Biomed Res Int* 2014; **2014**: 316204.
- 534
- 535 13. Chiang N, Takano T, Arita M, Watanabe S, Serhan CN. A novel rat lipoxin A4  
536 receptor that is conserved in structure and function. *Br J Pharmacol* 2003;  
537 **139**(1): 89-98.
- 538
- 539 14. Leo LM, Almeida-Correa S, Canetti CA, Amaral OB, Bozza FA, Pamplona FA.  
540 Age-dependent relevance of endogenous 5-lipoxygenase derivatives in anxiety-  
541 like behavior in mice. *PLoS One* 2014; **9**(1): e85009.
- 542
- 543 15. Medeiros R, Kitazawa M, Passos GF, Baglietto-Vargas D, Cheng D, Cribbs DH  
544 *et al.* Aspirin-triggered lipoxin A4 stimulates alternative activation of microglia and  
545 reduces Alzheimer disease-like pathology in mice. *Am J Pathol* 2013; **182**(5):  
546 1780-1789.
- 547



- 548 16. Sobrado M, Pereira MP, Ballesteros I, Hurtado O, Fernandez-Lopez D, Pradillo  
549 JM *et al.* Synthesis of lipoxin A4 by 5-lipoxygenase mediates PPARgamma-  
550 dependent, neuroprotective effects of rosiglitazone in experimental stroke. *J*  
551 *Neurosci* 2009; **29**(12): 3875-3884.  
552
- 553 17. Jatana M, Giri S, Ansari MA, Elango C, Singh AK, Singh I *et al.* Inhibition of NF-  
554 kappaB activation by 5-lipoxygenase inhibitors protects brain against injury in a  
555 rat model of focal cerebral ischemia. *J Neuroinflammation* 2006; **3**: 12.  
556
- 557 18. Derada Troletti C, Enzmann G, Chiurchiu V, Kamermans A, Tietz SM, Norris PC  
558 *et al.* Pro-resolving lipid mediator lipoxin A4 attenuates neuro-inflammation by  
559 modulating T cell responses and modifies the spinal cord lipidome. *Cell Rep*  
560 2021; **35**(9): 109201.  
561
- 562 19. Pamplona FA, Ferreira J, Menezes de Lima O, Jr., Duarte FS, Bento AF, Forner  
563 S *et al.* Anti-inflammatory lipoxin A4 is an endogenous allosteric enhancer of CB1  
564 cannabinoid receptor. *Proc Natl Acad Sci U S A* 2012; **109**(51): 21134-21139.  
565
- 566 20. Dunn HC, Ager RR, Baglietto-Vargas D, Cheng D, Kitazawa M, Cribbs DH *et al.*  
567 Restoration of lipoxin A4 signaling reduces Alzheimer's disease-like pathology in  
568 the 3xTg-AD mouse model. *J Alzheimers Dis* 2015; **43**(3): 893-903.  
569
- 570 21. Sochacki J, Devalle S, Reis M, de Moraes Maciel R, da Silveira Paulsen B,  
571 Brentani H *et al.* Generation of iPS cell lines from schizophrenia patients using a  
572 non-integrative method. *Stem Cell Res* 2016; **17**(1): 97-101.  
573
- 574 22. Sochacki J, Devalle S, Reis M, Fontenelle LF, Rehen S. Generation of urine iPS  
575 cell line from a patient with obsessive-compulsive disorder using a non-  
576 integrative method. *Stem Cell Res* 2016; **17**(1): 107-110.  
577

- 578 23. Paulsen BS, de Moraes Maciel R, Galina A, Souza da Silveira M, dos Santos  
579 Souza C, Drummond H *et al.* Altered oxygen metabolism associated to  
580 neurogenesis of induced pluripotent stem cells derived from a schizophrenic  
581 patient. *Cell Transplant* 2012; **21**(7): 1547-1559.  
582
- 583 24. Baharvand H, Mehrjardi N-Z, Hatami M, Kiani S, Rao M, Haghghi M-M. Neural  
584 differentiation from human embryonic stem cells in a defined adherent culture  
585 condition. *The International Journal of Developmental Biology* 2007; **51**(5): 371-  
586 378.  
587
- 588 25. Dakic V, Maciel RM, Drummond H, Nascimento JM, Trindade P, Rehen SK.  
589 Harmine stimulates proliferation of human neural progenitors. *PeerJ* 2016; **4**:  
590 e2727.  
591
- 592 26. Yan Y, Shin S, Jha BS, Liu Q, Sheng J, Li F *et al.* Efficient and rapid derivation of  
593 primitive neural stem cells and generation of brain subtype neurons from human  
594 pluripotent stem cells. *Stem Cells Transl Med* 2013; **2**(11): 862-870.  
595
- 596 27. Goto-Silva L, Ayad NME, Herzog IL, Silva NP, Lamien B, Orlande HRB *et al.*  
597 Computational fluid dynamic analysis of physical forces playing a role in brain  
598 organoid cultures in two different multiplex platforms. *BMC Dev Biol* 2019; **19**(1):  
599 3.  
600
- 601 28. Abràmoff MD, Magalhães PJ, Ram SJ. Image processing with ImageJ.  
602 *Biophotonics International* 2004; **2004**(7): 1-7.  
603
- 604 29. Lourenco MV, Frozza RL, de Freitas GB, Zhang H, Kincheski GC, Ribeiro FC *et*  
605 *al.* Exercise-linked FNDC5/irisin rescues synaptic plasticity and memory defects  
606 in Alzheimer's models. *Nat Med* 2019; **25**(1): 165-175.  
607

- 608 30. Drummond C, Coutinho G, Monteiro MC, Assuncao N, Teldeschi A, Souza AS *et al.* Narrative impairment, white matter damage and CSF biomarkers in the  
609 Alzheimer's disease spectrum. *Aging* 2019; **11**(20): 9188-9208.  
610  
611
- 612 31. Lourenco MV, Ribeiro FC, Sudo FK, Drummond C, Assuncao N, Vanderborght B  
613 *et al.* Cerebrospinal fluid irisin correlates with amyloid-beta, BDNF, and cognition  
614 in Alzheimer's disease. *Alzheimers Dement (Amst)* 2020; **12**(1): e12034.  
615
- 616 32. Drummond C, Coutinho G, Fonseca RP, Assuncao N, Teldeschi A, de Oliveira-  
617 Souza R *et al.* Deficits in narrative discourse elicited by visual stimuli are already  
618 present in patients with mild cognitive impairment. *Front Aging Neurosci* 2015; **7**:  
619 96.  
620
- 621 33. Lourenco MV, Ribeiro FC, Santos LE, Beckman D, Melo HM, Sudo FK *et al.*  
622 Cerebrospinal Fluid Neurotransmitters, Cytokines, and Chemokines in  
623 Alzheimer's and Lewy Body Diseases. *J Alzheimers Dis* 2021.  
624
- 625 34. Gangemi S, Pescara L, D'Urbano E, Basile G, Nicita-Mauro V, Davi G *et al.*  
626 Aging is characterized by a profound reduction in anti-inflammatory lipoxin A4  
627 levels. *Exp Gerontol* 2005; **40**(7): 612-614.  
628
- 629 35. Yousef H, Czupalla CJ, Lee D, Chen MB, Burke AN, Zera KA *et al.* Aged blood  
630 impairs hippocampal neural precursor activity and activates microglia via brain  
631 endothelial cell VCAM1. *Nat Med* 2019; **25**(6): 988-1000.  
632
- 633 36. Mattson MP. Pathways towards and away from Alzheimer's disease. *Nature*  
634 2004; **430**(7000): 631-639.  
635
- 636 37. Herrup K. Reimagining Alzheimer's disease--an age-based hypothesis. *J*  
637 *Neurosci* 2010; **30**(50): 16755-16762.  
638

- 639 38. Buchman AS, Yu L, Boyle PA, Schneider JA, De Jager PL, Bennett DA. Higher  
640 brain BDNF gene expression is associated with slower cognitive decline in older  
641 adults. *Neurology* 2016; **86**(8): 735-741.  
642
- 643 39. Forlenza OV, Diniz BS, Teixeira AL, Radanovic M, Talib LL, Rocha NP *et al.*  
644 Lower Cerebrospinal Fluid Concentration of Brain-Derived Neurotrophic Factor  
645 Predicts Progression from Mild Cognitive Impairment to Alzheimer's Disease.  
646 *Neuromolecular Med* 2015; **17**(3): 326-332.  
647
- 648 40. Heppner FL, Ransohoff RM, Becher B. Immune attack: the role of inflammation  
649 in Alzheimer disease. *Nat Rev Neurosci* 2015; **16**(6): 358-372.  
650
- 651 41. Czirr E, Wyss-Coray T. The immunology of neurodegeneration. *J Clin Invest*  
652 2012; **122**(4): 1156-1163.  
653
- 654 42. Joshi YB, Pratico D. Knockout of 5-lipoxygenase results in age-dependent  
655 anxiety-like behavior in female mice. *PLoS One* 2011; **6**(12): e29448.  
656
- 657 43. Giannopoulos PF, Chu J, Joshi YB, Sperow M, Li JG, Kirby LG *et al.* Gene  
658 knockout of 5-lipoxygenase rescues synaptic dysfunction and improves memory  
659 in the triple-transgenic model of Alzheimer's disease. *Mol Psychiatry* 2014; **19**(4):  
660 511-518.  
661
- 662 44. Chu J, Pratico D. Pharmacologic blockade of 5-lipoxygenase improves the  
663 amyloidotic phenotype of an Alzheimer's disease transgenic mouse model  
664 involvement of gamma-secretase. *Am J Pathol* 2011; **178**(4): 1762-1769.  
665
- 666 45. Vagnozzi AN, Giannopoulos PF, Pratico D. The direct role of 5-lipoxygenase on  
667 tau pathology, synaptic integrity and cognition in a mouse model of tauopathy.  
668 *Transl Psychiatry* 2017; **7**(12): 1288.  
669

- 670 46. Valera E, Dargusch R, Maher PA, Schubert D. Modulation of 5-lipoxygenase in  
671 proteotoxicity and Alzheimer's disease. *J Neurosci* 2013; **33**(25): 10512-10525.  
672
- 673 47. Robin LM, Oliveira da Cruz JF, Langlais VC, Martin-Fernandez M, Metna-Laurent  
674 M, Busquets-Garcia A *et al.* Astroglial CB1 Receptors Determine Synaptic D-  
675 Serine Availability to Enable Recognition Memory. *Neuron* 2018; **98**(5): 935-944  
676 e935.  
677
- 678 48. Benard G, Massa F, Puente N, Lourenco J, Bellocchio L, Soria-Gomez E *et al.*  
679 Mitochondrial CB(1) receptors regulate neuronal energy metabolism. *Nat*  
680 *Neurosci* 2012; **15**(4): 558-564.  
681
- 682 49. Castillo PE, Younts TJ, Chavez AE, Hashimotodani Y. Endocannabinoid  
683 signaling and synaptic function. *Neuron* 2012; **76**(1): 70-81.  
684
- 685 50. Bacci A, Huguenard JR, Prince DA. Long-lasting self-inhibition of neocortical  
686 interneurons mediated by endocannabinoids. *Nature* 2004; **431**(7006): 312-316.  
687
- 688 51. Albayram O, Alferink J, Pitsch J, Piyanova A, Neitzert K, Poppensieker K *et al.*  
689 Role of CB1 cannabinoid receptors on GABAergic neurons in brain aging. *Proc*  
690 *Natl Acad Sci U S A* 2011; **108**(27): 11256-11261.  
691
- 692 52. Heneka MT, Golenbock DT, Latz E. Innate immunity in Alzheimer's disease. *Nat*  
693 *Immunol* 2015; **16**(3): 229-236.  
694
- 695 53. Bawa KK, Krance SH, Herrmann N, Cogo-Moreira H, Ouk M, Yu D *et al.* A  
696 peripheral neutrophil-related inflammatory factor predicts a decline in executive  
697 function in mild Alzheimer's disease. *J Neuroinflammation* 2020; **17**(1): 84.  
698

- 699 54. Swardfager W, Lanctot K, Rothenburg L, Wong A, Cappell J, Herrmann N. A  
700 meta-analysis of cytokines in Alzheimer's disease. *Biol Psych* 2010; **68**(10): 930-  
701 941.
- 702
- 703 55. Zenaro E, Pietronigro E, Della Bianca V, Piacentino G, Marongiu L, Budui S *et al.*  
704 Neutrophils promote Alzheimer's disease-like pathology and cognitive decline via  
705 LFA-1 integrin. *Nat Med* 2015; **21**(8): 880-886.
- 706
- 707 56. Cruz Hernandez JC, Bracko O, Kersbergen CJ, Muse V, Haft-Javaherian M,  
708 Berg M *et al.* Neutrophil adhesion in brain capillaries reduces cortical blood flow  
709 and impairs memory function in Alzheimer's disease mouse models. *Nat*  
710 *Neurosci* 2019; **22**(3): 413-420.
- 711
- 712 57. Baik SH, Cha MY, Hyun YM, Cho H, Hamza B, Kim DK *et al.* Migration of  
713 neutrophils targeting amyloid plaques in Alzheimer's disease mouse model.  
714 *Neurobiol Aging* 2014; **35**(6): 1286-1292.
- 715
- 716 58. Russo EB. Clinical Endocannabinoid Deficiency Reconsidered: Current  
717 Research Supports the Theory in Migraine, Fibromyalgia, Irritable Bowel, and  
718 Other Treatment-Resistant Syndromes. *Cannabis Cannabinoid Res* 2016; **1**(1):  
719 154-165.
- 720

## 721 **Figure Legends**

722

723 **Figure 1. LXA4 is produced by neurons and microglia.** (a) Levels of lipoxin A4  
724 (LXA4) in primary cultures enriched in astrocytes, microglia or neurons derived from  
725 mice (left) or in human iPSC-derived astrocytes, microglia, neurons, or neural progenitor  
726 cells (NPCs). Unpaired two-tailed one-way ANOVA with Šidák post hoc test (\*\**p* <  
727 0.001; \*\*\*\**p* < 0.0001; n.s. non-significant). n.d.; not detected. (b) Representative  
728 images of immunofluorescence experiments (5-lipoxygenase, 5-LOX immunoreactivity:

729 green; microtubule-associated protein 2, MAP2 immunoreactivity: red; DAPI: blue; N=3)  
730 in human iPSC-derived brain organoids. Scale bar: 10  $\mu$ m.

731  
732 **Figure 2. Age-linked reductions in LXA4 result in cognitive impairment.** (a,b)  
733 Levels of lipoxin A4 (LXA4) in plasma (a) and brain (b) of young (3 month-old) or aged  
734 (12 month-old) Swiss mice. (c) Step-down latency of young or aged mice in the  
735 inhibitory avoidance task. (d) Number of trials required for each mouse to reach the  
736 criteria during the training session in the inhibitory avoidance fear task. (e,f) Step-down  
737 latency of 5-LOX<sup>-/-</sup> or WT mice (3 month-old) in the inhibitory avoidance task to assess  
738 short-term (e; 1 hour after training) or long-term memory (f; 24 hours after training). For  
739 a, b, and d, two-tailed unpaired Student's t-test. For c, e, and f, two-tailed unpaired  
740 Mann-Whitney (\* p < 0.05; \*\*\*\* p < 0.0001). Graphs show means  $\pm$  standard error of the  
741 mean (SEM). Each dot represents an individual. (g) Fear memory extinction assessed  
742 by step-down latency of 5-LOX<sup>-/-</sup> or WT after repeated test sessions twelve to fifteen  
743 days after original conditioning session. Repeated measures one-way ANOVA with  
744 Šidák post hoc test (\* p < 0.05). Graphs show means  $\pm$  SEM.

745  
746 **Figure 3. LXA4 attenuates inflammation-induced memory failure and cytokine**  
747 **production in mice.** (a) Freezing (seconds) of control or LPS-injected mice (0.3 mg/kg)  
748 treated with vehicle or 1 pmol LXA4 (i.c.v) in the contextual fear conditioning task. (b-e)  
749 Brain and plasma levels of IL-1 $\beta$  (b,c) or IL-6 (d,e) in control or LPS-injected mice (0.3  
750 mg/kg; i.p.) treated with vehicle or 1 pmol LXA4 (i.c.v). Two-tailed unpaired two-way  
751 ANOVA followed by Holm-Šidák post hoc test (\* p < 0.05; \*\* p < 0.01; \*\*\* p < 0.001; \*\*\*\*  
752 p < 0.0001). Graphs show means  $\pm$  standard error of the mean (SEM).

753  
754 **Figure 4. Cerebrospinal fluid LXA4 is reduced in aging and in dementia in**  
755 **humans.** (a) Correlation between age (in years) and CSF LXA4 in human subjects. (b)  
756 CSF levels of LXA4 in AD and DLB patients compared to healthy controls or amnesic  
757 MCI patients (N = 25 controls, 13 aMCI, 14 AD, 9 LBD patients). Two-tailed unpaired  
758 one-way ANOVA followed by Holm-Šidák post hoc test (\*\* p < 0.01; ns, non-  
759 significant). Graphs show means  $\pm$  standard error of the mean (SEM). (c-e) Correlations

760 between LXA4 and MMSE scores (c), CSF BDNF (d) or  $A\beta_{42}$  (e) levels in human  
761 subjects. Lines represent partial rank correlations (r and p-values as indicated in  
762 graphs), adjusted for age, and the confidence interval is represented as gray shade. (f)  
763 Receiver-operating characteristic curves for diagnostic based on  $A\beta_{42}$  alone (red line) or  
764 LXA4\* $A\beta_{42}$  (blue line); confidence interval: 0.95;  $p < 0.001$ . HC: healthy controls, white  
765 symbols; aMCI: amnesic mild cognitive impairment, grey symbols; AD: Alzheimer's  
766 disease, black symbols; DLB: dementia with Lewy bodies, golden symbols); AUC: area  
767 under curve.



a

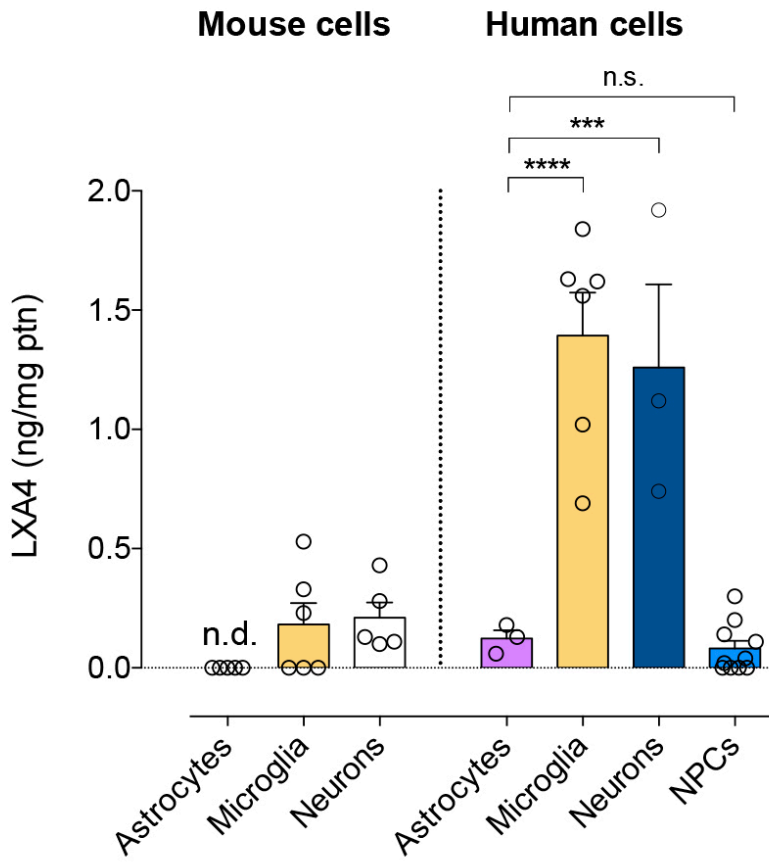

b

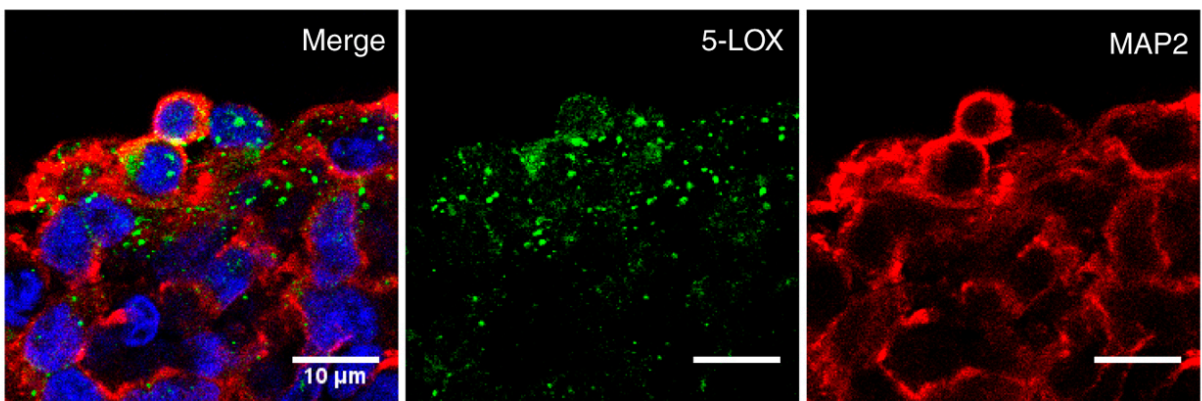

Figure 1

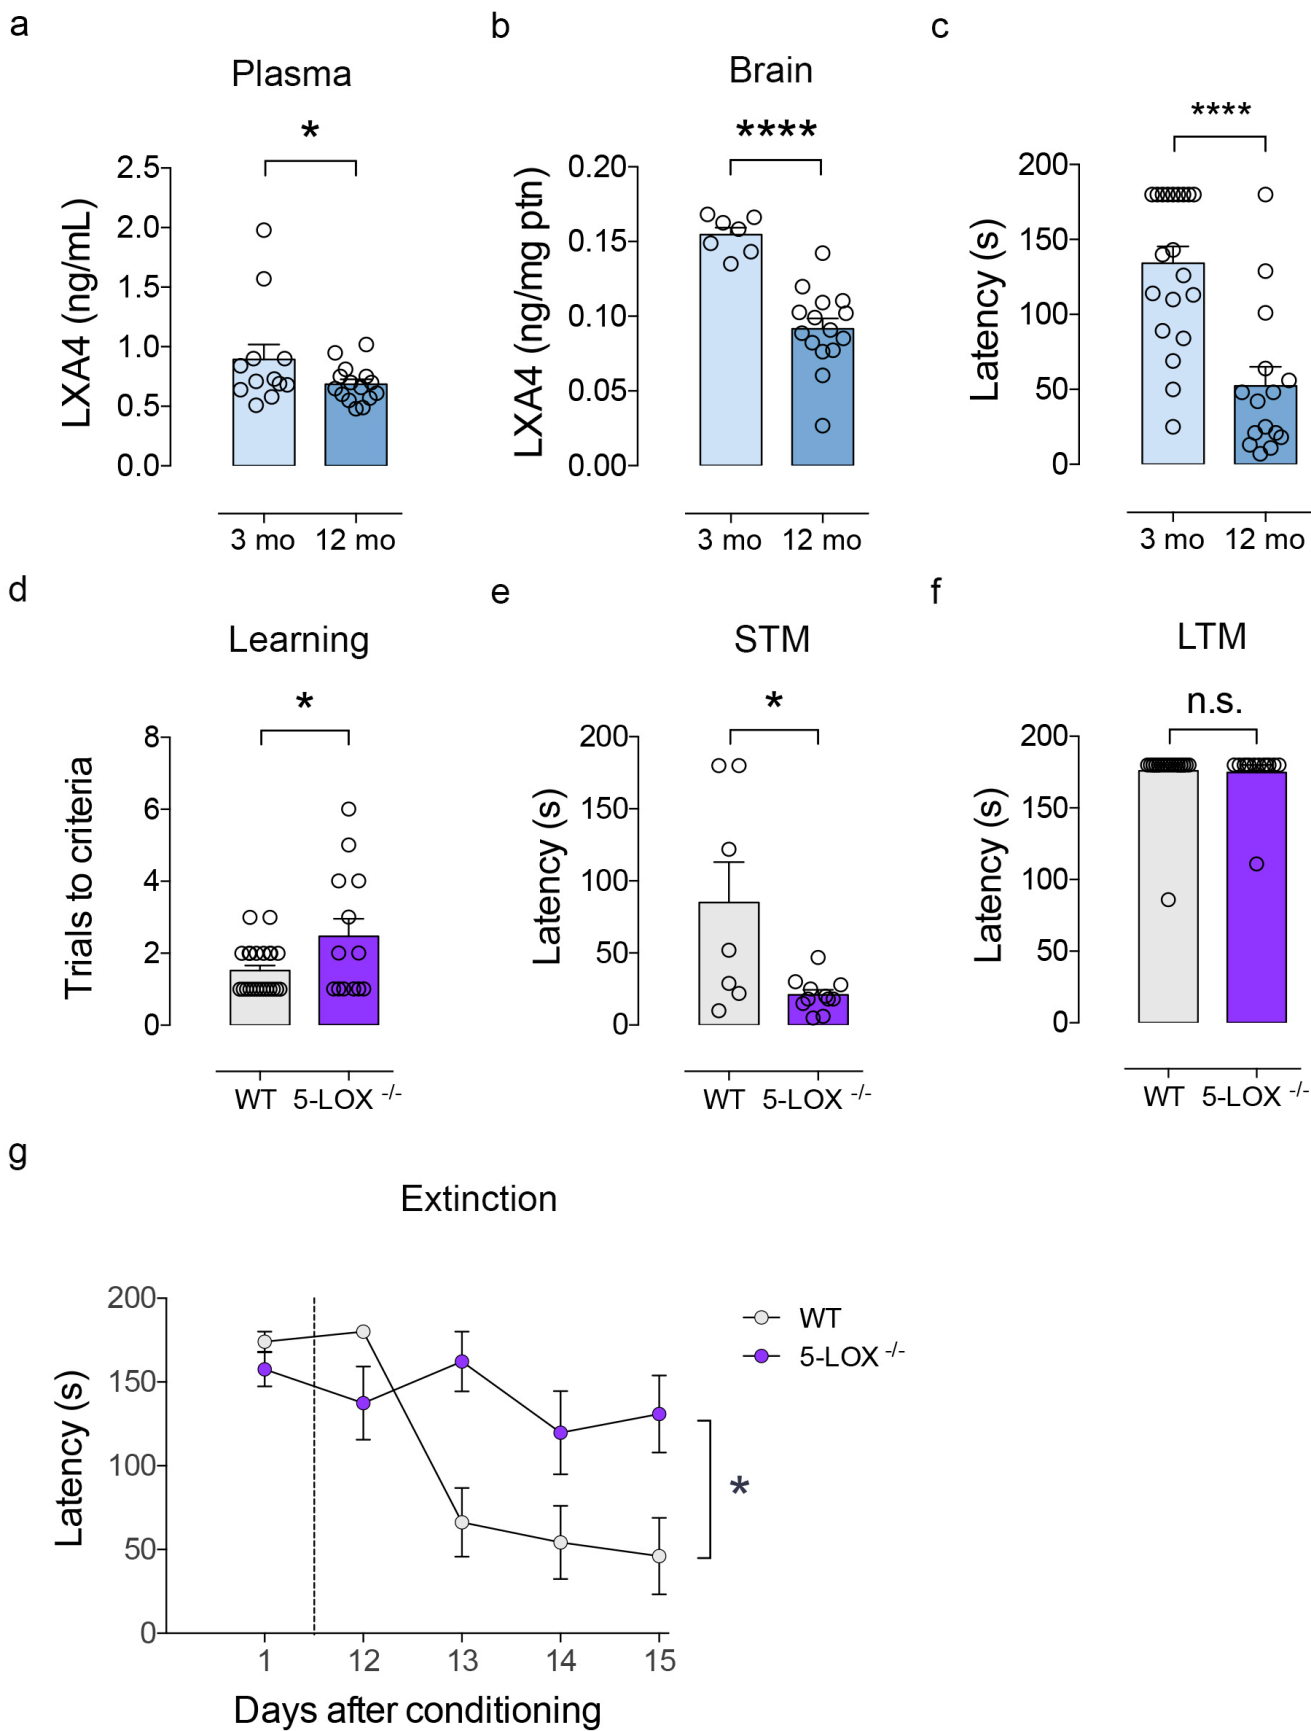

Figure 2

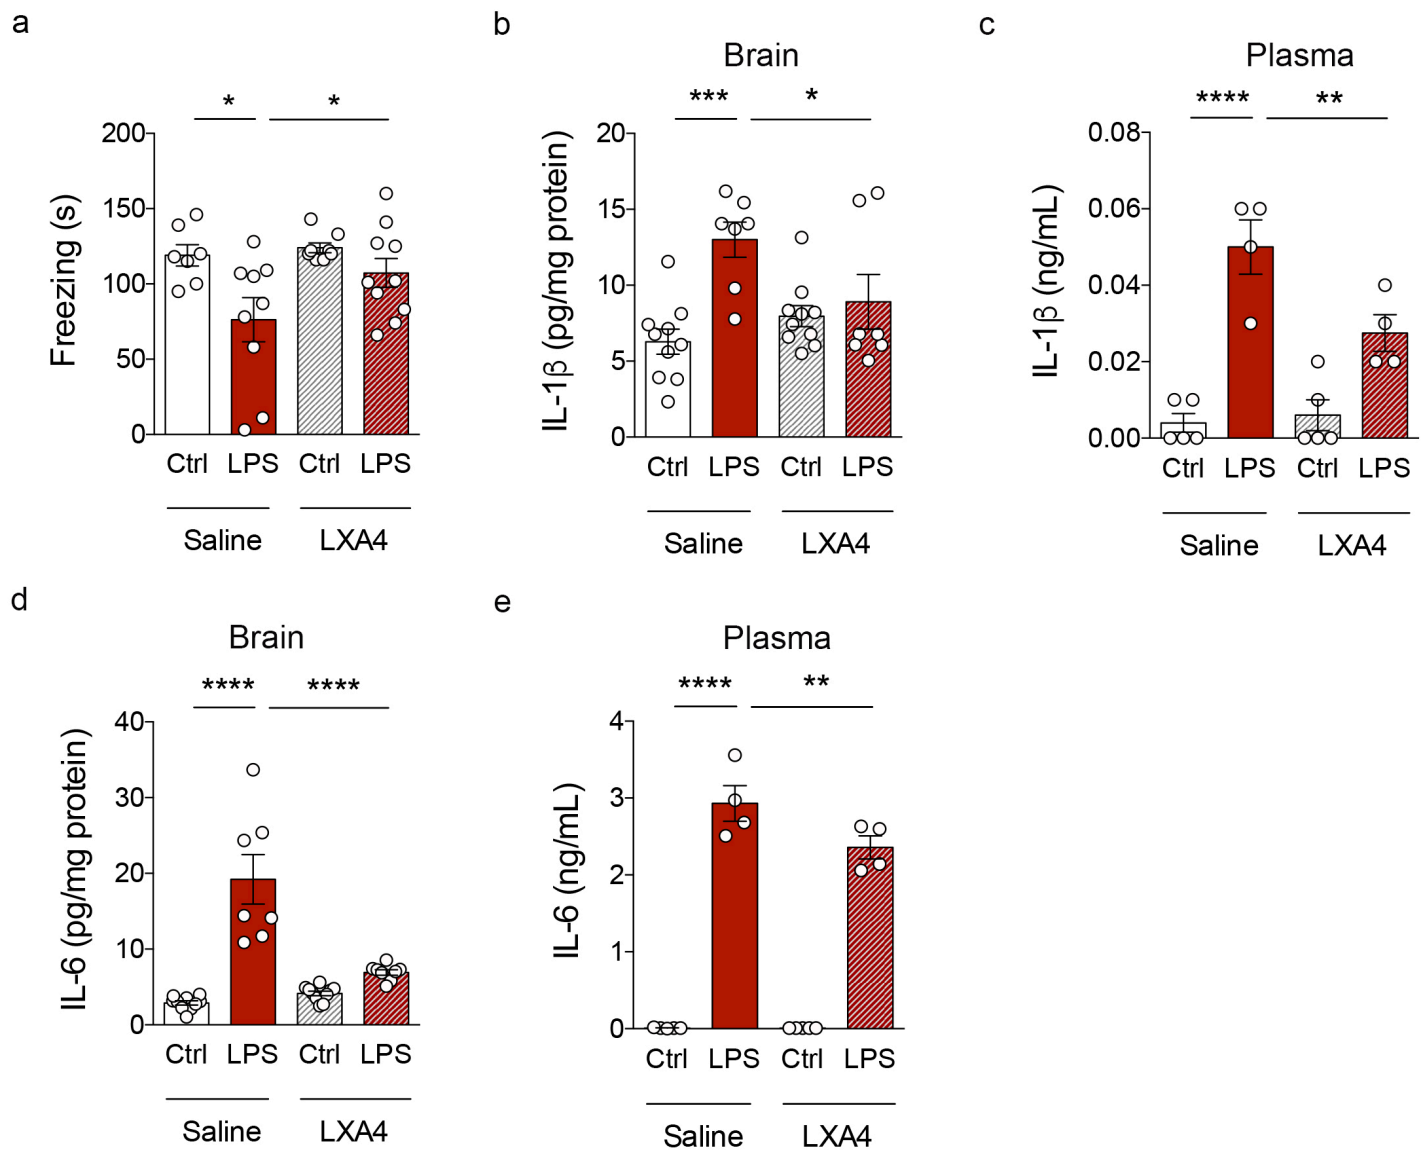

Figure 3

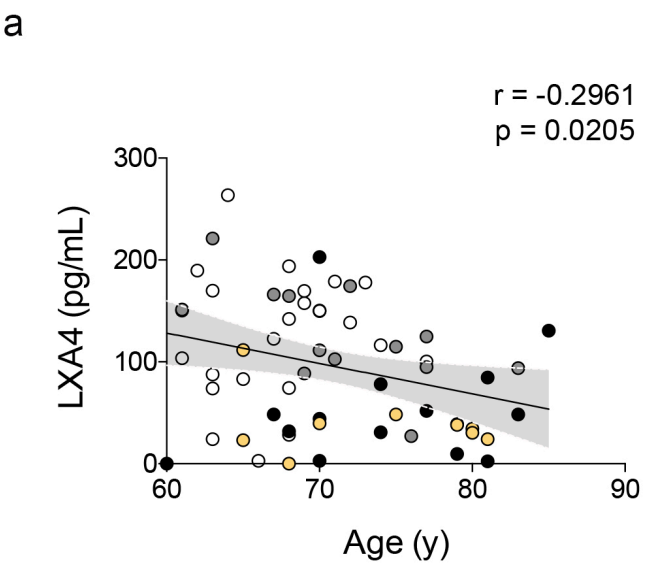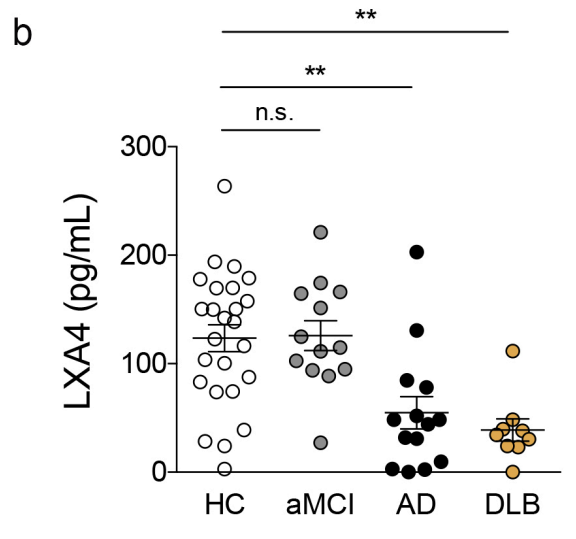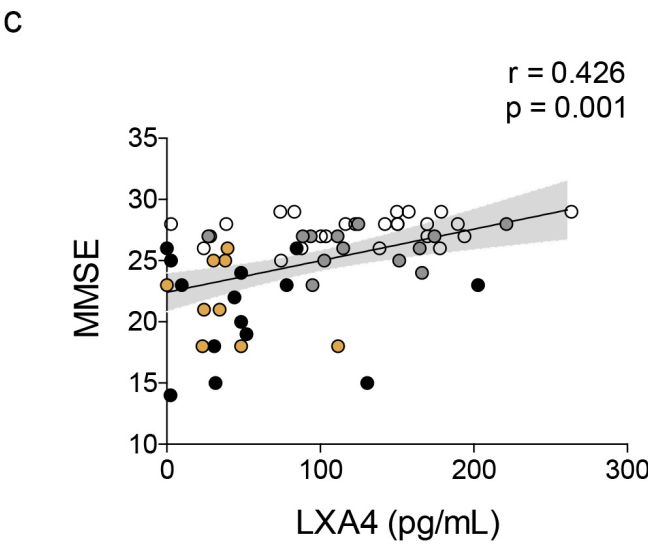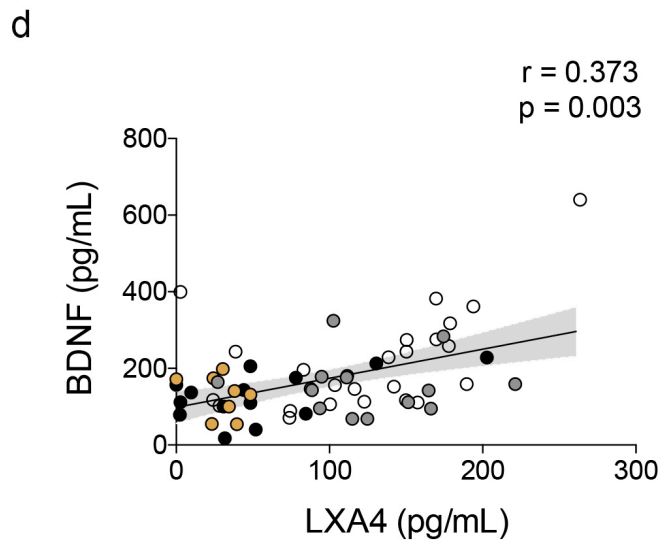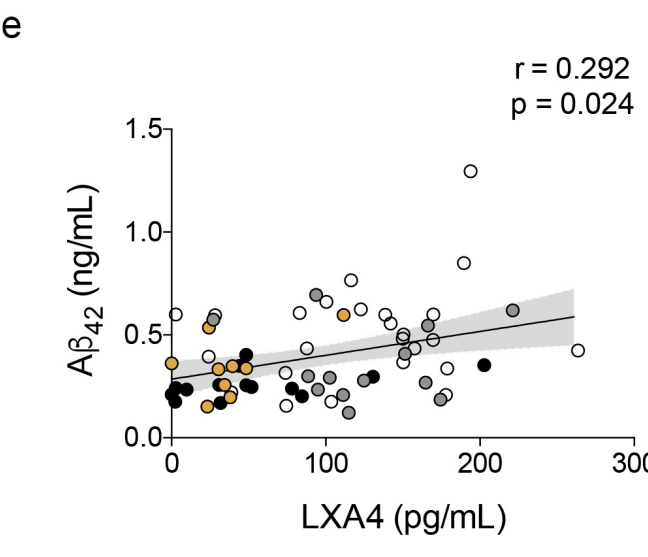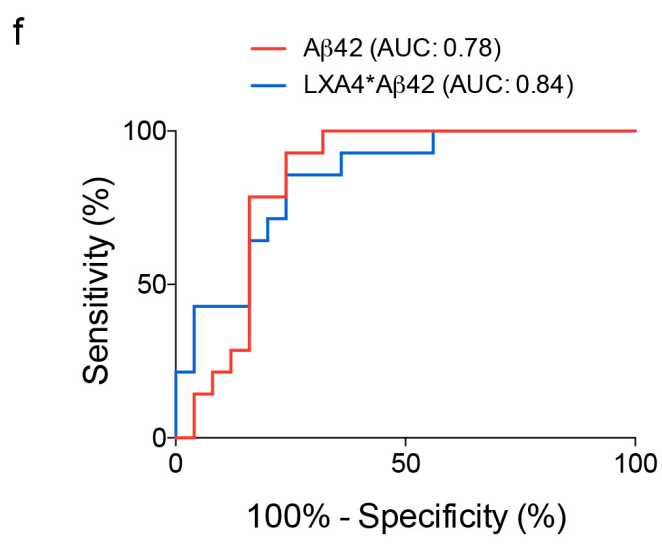

Figure 4
